# Supplementary material for: Synthesis of sol–gel poly(ethylene glycol) coated foams for the microextraction of multiclass pesticides from apple juice samples
Source: Royal Society of Chemistry journal article supplement (doi:10.1039/d6ra01360k), 2026-05-20
Supplement: d6ra01360k1.pdf [file d6ra01360k1.pdf]

## Supplementary Material

### **Synthesis of sol-gel poly(ethyleneglycol) coated foams for the microextraction of multiclass pesticides from apple juice samples**

Apostolia Tsiasioti<sup>a,b</sup>, Natalia Manousi<sup>a</sup>, Abuzar Kabir<sup>c</sup>, Aristidis Anthemidis<sup>b</sup>, Erwin Rosenberg<sup>a,\*</sup>

*<sup>a</sup> Institute of Chemical Technologies and Analytics, TU Wien, 1060 Vienna, Austria*

*<sup>b</sup> Laboratory of Analytical Chemistry, Department of Chemistry, Aristotle University of Thessaloniki GR-54124 Thessaloniki, Greece*

*<sup>c</sup> International Forensic Research Institute, Department of Chemistry and Biochemistry, Florida International University, Miami, FL, USA*

*\*Correspondence: [egon.rosenberg@tuwien.ac.at](mailto:egon.rosenberg@tuwien.ac.at)*

Triazines

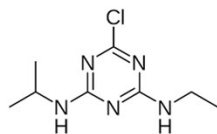

Atrazine

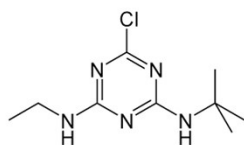

Terbutylazine

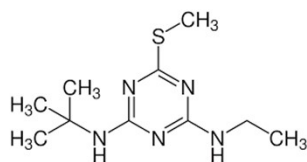

Terbutryn

Phenylurea pesticides

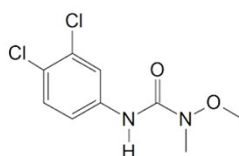

Linuron

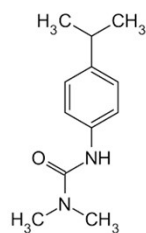

Isoproturon

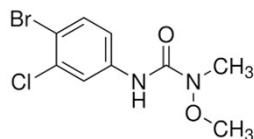

Chlorbromuron

Benzoylurea pesticide

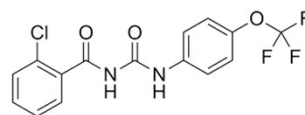

Triflumuron

**Figure S1.** Chemical structures of the studied pesticides.

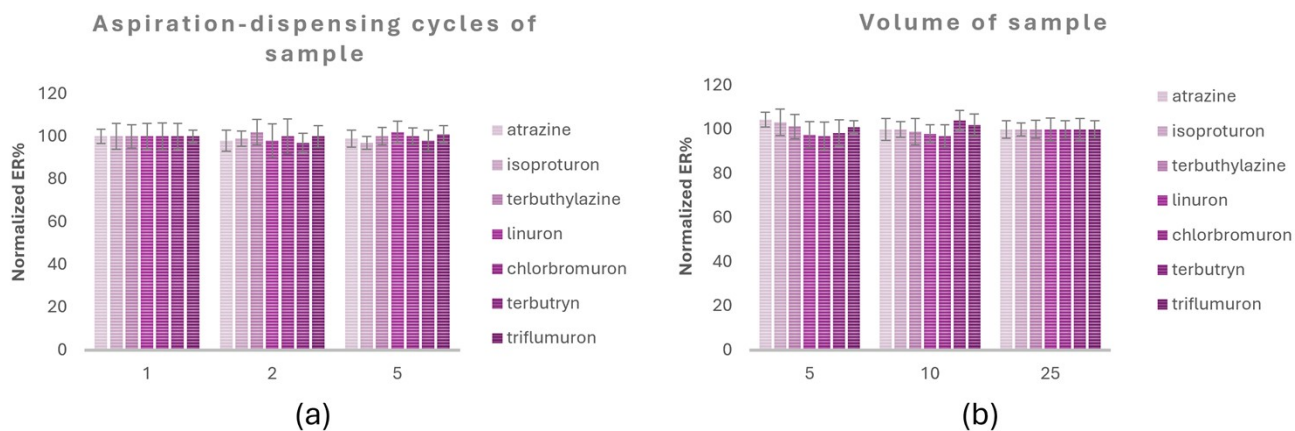

**Figure S2.** Normalized ER% (average of two repetitions  $\pm$  standard deviation) for the investigation of the effect of (a) aspiration-dispensing cycles of the same aliquot of the sample, and (b) volume of sample on the performance of the FIS-SPE protocol

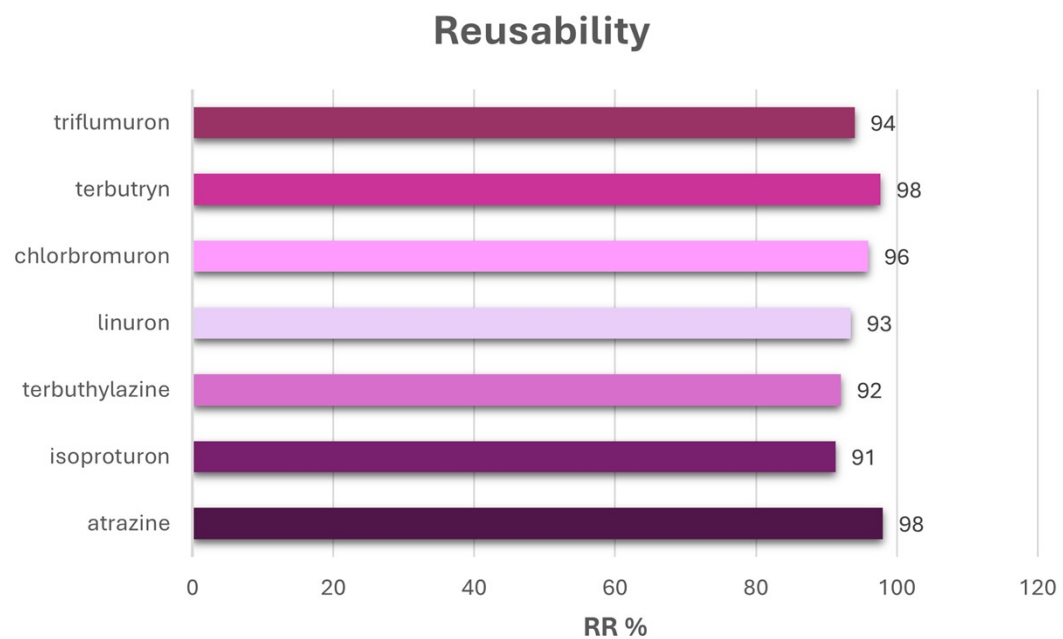

**Figure S3.** Evaluation of reusability of the sol-gel CW 20 M coated foam, expressed as relative recovery (RR%) after thirty-five consecutive extractions.

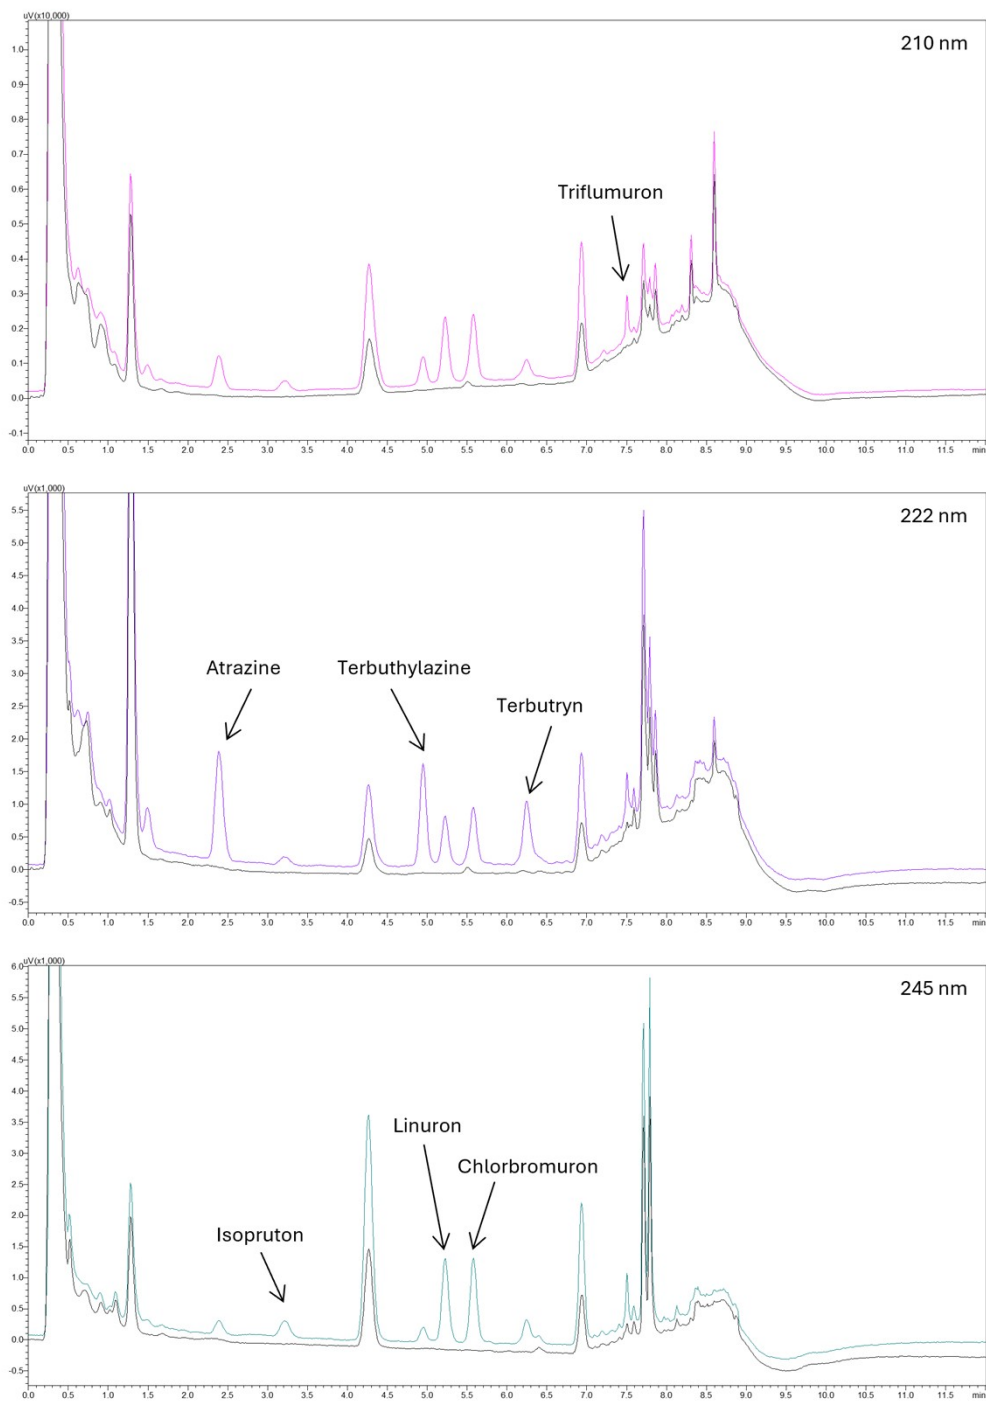

**Figure S4.** Chromatograms of the analysis of blank (black line) and spiked (colored line) apple juice samples ( $50 \text{ ng mL}^{-1}$ ) through the developed method at the optimum wavelength for each analyte.

**Table S1.** HPLC gradient program of the mobile phase.

| <b>Time (min)</b> | <b>Composition</b>   |                    |
|-------------------|----------------------|--------------------|
|                   | <b>A<br/>(Water)</b> | <b>B<br/>(ACN)</b> |
| 0.00              | 75                   | 25                 |
| 2.50              | 75                   | 25                 |
| 4.50              | 65                   | 35                 |
| 5.50              | 65                   | 35                 |
| 6.00              | 60                   | 40                 |
| 8.00              | 10                   | 90                 |
| 9.00              | 75                   | 25                 |
| 12.00             | 75                   | 25                 |

**Table S2.** Trueness and precision of the proposed FIS-SPE-HPLC-DAD method.

| Analyte       | Added<br>(ng mL <sup>-1</sup> ) | Intra-Day (n=3)                 |      |     | Inter-Day (n=3 × 3)             |      |     |
|---------------|---------------------------------|---------------------------------|------|-----|---------------------------------|------|-----|
|               |                                 | Found<br>(ng mL <sup>-1</sup> ) | RSD% | RR% | Found<br>(ng mL <sup>-1</sup> ) | RSD% | RR% |
| Atrazine      | 25.0                            | 27.1 ± 1.0                      | 4    | 108 | 24.5 ± 1.1                      | 4    | 98  |
|               | 250.0                           | 267 ± 17                        | 6    | 107 | 229 ± 25                        | 11   | 92  |
| Isoproturon   | 25.0                            | 21.7 ± 1.6                      | 8    | 87  | 25.3 ± 1.9                      | 7    | 101 |
|               | 250.0                           | 279 ± 29                        | 10   | 112 | 226 ± 21                        | 9    | 90  |
| Terbutylazine | 25.0                            | 23.3 ± 2.0                      | 8    | 93  | 26.6 ± 1.9                      | 7    | 106 |
|               | 250.0                           | 276 ± 21                        | 8    | 110 | 230 ± 28                        | 12   | 92  |
| Linuron       | 25.0                            | 28.1 ± 2.4                      | 8    | 112 | 24.3 ± 2.8                      | 12   | 97  |
|               | 250.0                           | 290 ± 26                        | 9    | 116 | 231 ± 25                        | 11   | 92  |
| Chlorbromuron | 25.0                            | 27.4 ± 2.2                      | 8    | 110 | 25.1 ± 2.6                      | 11   | 100 |
|               | 250.0                           | 289 ± 27                        | 9    | 116 | 238 ± 22                        | 9    | 95  |
| Terbutryn     | 25.0                            | 26.8 ± 1.5                      | 6    | 107 | 26.3 ± 3.1                      | 12   | 105 |
|               | 250.0                           | 235 ± 10                        | 4    | 94  | 256 ± 14                        | 5    | 102 |
| Triflumuron   | 25.0                            | 23.1 ± 1.9                      | 8    | 92  | 26.4 ± 2.4                      | 9    | 106 |
|               | 250.0                           | 240 ± 17                        | 7    | 96  | 251 ± 22                        | 9    | 100 |

**Table S3.** Robustness evaluation of the FIS-SPE-HPLC-DAD method.

| Parameter (optimum value)          | Variations    | Relative recovery % |           |                |         |               |           |             |
|------------------------------------|---------------|---------------------|-----------|----------------|---------|---------------|-----------|-------------|
|                                    |               | Atrazine            | Isopruton | Terbuthylazine | Linuron | Chlorbromuron | Terbutryn | Triflumuron |
| <b>V<sub>sample</sub> (25 mL)</b>  | <b>26 mL</b>  | 98                  | 99        | 98             | 100     | 98            | 99        | 99          |
|                                    | <b>24 mL</b>  | 98                  | 97        | 96             | 98      | 102           | 98        | 97          |
| <b>V<sub>eluent</sub> (500 µL)</b> | <b>525 µL</b> | 102                 | 98        | 100            | 97      | 99            | 102       | 102         |
|                                    | <b>475 µL</b> | 97                  | 96        | 98             | 105     | 97            | 98        | 97          |
| <b>Foam height (1.5 cm)</b>        | <b>1.6 cm</b> | 96                  | 97        | 97             | 104     | 105           | 96        | 95          |
|                                    | <b>1.4 cm</b> | 101                 | 101       | 101            | 103     | 96            | 101       | 100         |

**Table S4.** ComplexGAPI attributes and their justification.

| #                           | ComplexGAPI Attribute             | Justification                                       | Color  |
|-----------------------------|-----------------------------------|-----------------------------------------------------|--------|
| 1                           | Collection                        | At-line                                             | Yellow |
| 2                           | Preservation                      | None                                                | Green  |
| 3                           | Transport                         | Required                                            | Red    |
| 4                           | Storage                           | Under normal conditions                             | Yellow |
| 5                           | Type of method                    | Extraction required                                 | Red    |
| 6                           | Scale of extraction               | Miniaturized FIS-SPE                                | Yellow |
| 7                           | Solvents/reagents used            | Non-green solvents/reagents used                    | Red    |
| 8                           | Additional treatment              | None                                                | Green  |
| 9                           | Solvents/reagents amount          | <10 mL                                              | Green  |
| 10                          | Health hazard                     | Moderately toxic; NFPA: 2-3                         | Yellow |
| 11                          | Safety hazard                     | Highest NFPA flammability or instability score: 2-3 | Yellow |
| 12                          | Energy                            | ≤ 1.5 kWh per sample                                | Yellow |
| 13                          | Occupational hazard               | Hermetic sealing of analytical process              | Green  |
| 14                          | Waste                             | >10 mL                                              | Red    |
| 15                          | Waste treatment                   | No treatment                                        | Red    |
| <b>Yield and conditions</b> |                                   |                                                     |        |
| <b>I</b>                    |                                   |                                                     | Green  |
|                             | Yield                             | >89%                                                |        |
| <b>II</b>                   | Temperature/time                  | Heating > 1 h                                       | Red    |
| <b>III</b>                  | Number of green economy rules met | 5-6                                                 | Green  |

| #               | ComplexGAPI Attribute             | Justification                                       | Color  |
|-----------------|-----------------------------------|-----------------------------------------------------|--------|
| IV <sub>a</sub> | Health hazard                     | Moderately toxic; NFPA: 2-3                         | Yellow |
| IV <sub>b</sub> | Safety hazard                     | Highest NFPA flammability or instability score: 2-3 | Yellow |
| V <sub>a</sub>  | Technical set                     | Common setup                                        | Green  |
| V <sub>b</sub>  | Energy                            | ≤ 0.1 kWh per sample                                | Green  |
| V <sub>c</sub>  | Occupational hazard               | Hermetization of the analytical process             | Green  |
| VI <sub>a</sub> | End products workup, purification | None/simple process                                 | Green  |
| VI <sub>b</sub> | Purity                            | >98%                                                | Green  |
| -               | <b>E-factor</b>                   | 1                                                   | -      |

**Table S5.** BAGI attributes and their justification.

| #  | BAGI Attribute                    | Justification                                                                              | Points | Color      |
|----|-----------------------------------|--------------------------------------------------------------------------------------------|--------|------------|
| 1  | Type of Analysis                  | Quantitative and confirmatory<br>(HPLC-DAD)                                                | 10     | Dark blue  |
| 2  | Multi- or single-element analysis | Multi-element analysis for 2-15 compounds of different classes                             | 7.5    | Blue       |
| 3  | Analytical technique              | HPLC-DAD: Simple instrumentation available in most QC labs                                 | 7.5    | Blue       |
| 4  | Simultaneous sample preparation   | 1                                                                                          | 2.5    | White      |
| 5  | Sample preparation                | FIS-SPE Miniaturized sample preparation                                                    | 5.0    | Light blue |
| 6  | Samples per h                     | 2-4 (12 min analysis time + 1 min sample preparation)                                      | 5.0    | Light blue |
| 7  | Reagents and materials            | Sol-gel foam needs to be synthesized in the lab (simple procedure, common instrumentation) | 5.0    | Light blue |
| 8  | Preconcentration                  | No preconcentration required                                                               | 10     | Dark blue  |
| 9  | Degree of automation              | Semi-automation (HPLC autosampler)                                                         | 7.5    | Blue       |
| 10 | Amount of sample                  | 25 mL of juice                                                                             | 7.5    | Blue       |

**Table S6.** Determination of pesticides in fruit juice samples through the proposed method (average value  $\pm$  standard deviation).

| Analytes      | Added<br>(ng mL <sup>-1</sup> ) | Sample 1                        |       | Sample 2                        |         | Sample 3                        |       | Sample 4                        |       | Sample 5                        |         | Sample 6                        |       |
|---------------|---------------------------------|---------------------------------|-------|---------------------------------|---------|---------------------------------|-------|---------------------------------|-------|---------------------------------|---------|---------------------------------|-------|
|               |                                 | Found<br>(ng mL <sup>-1</sup> ) | RR%   | Found<br>(ng mL <sup>-1</sup> ) | RR<br>% | Found<br>(ng mL <sup>-1</sup> ) | RR%   | Found<br>(ng mL <sup>-1</sup> ) | RR%   | Found<br>(ng mL <sup>-1</sup> ) | RR<br>% | Found<br>(ng mL <sup>-1</sup> ) | RR%   |
| Atrazine      | -                               | < LOD                           | -     | < LOD                           | -       | < LOD                           | -     | < LOD                           | -     | < LOD                           | -       | < LOD                           | -     |
|               | 25.0                            | 27.4 $\pm$ 2.4                  | 109.5 | 26.2 $\pm$ 1.2                  | 104.9   | 24.4 $\pm$ 2.3                  | 97.8  | 25.4 $\pm$ 1.0                  | 101.6 | 29.2 $\pm$ 2.3                  | 116.7   | 27.3 $\pm$ 0.5                  | 109.4 |
| Isoproturon   | -                               | < LOD                           | -     | < LOD                           | -       | < LOD                           | -     | < LOD                           | -     | < LOD                           | -       | < LOD                           | -     |
|               | 25.0                            | 24.2 $\pm$ 1.2                  | 96.6  | 23.0 $\pm$ 2.5                  | 92.0    | 28.7 $\pm$ 2.8                  | 114.8 | 21.2 $\pm$ 1.2                  | 85.0  | 27.7 $\pm$ 1.2                  | 110.9   | 23.8 $\pm$ 1.3                  | 95.1  |
| Terbutylazine | -                               | < LOD                           | -     | < LOD                           | -       | < LOD                           | -     | < LOD                           | -     | < LOD                           | -       | < LOD                           | -     |
|               | 25.0                            | 23.7 $\pm$ 1.9                  | 94.7  | 25.3 $\pm$ 1.4                  | 101.3   | 22.0 $\pm$ 1.0                  | 88.2  | 21.1 $\pm$ 0.3                  | 84.8  | 29.1 $\pm$ 0.7                  | 116.6   | 23.6 $\pm$ 0.8                  | 94.3  |
| Linuron       | -                               | < LOD                           | -     | < LOD                           | -       | < LOD                           | -     | < LOD                           | -     | < LOD                           | -       | < LOD                           | -     |
|               | 25.0                            | 27.0 $\pm$ 2.3                  | 108.0 | 29.1 $\pm$ 1.4                  | 116.4   | 29.5 $\pm$ 0.5                  | 118.0 | 25.9 $\pm$ 1.2                  | 103.8 | 29.4 $\pm$ 1.5                  | 117.6   | 25.5 $\pm$ 0.9                  | 102.0 |
| Chlorbromuron | -                               | < LOD                           | -     | < LOD                           | -       | < LOD                           | -     | < LOD                           | -     | < LOD                           | -       | < LOD                           | -     |
|               | 25.0                            | 26.8 $\pm$ 2.6                  | 107.3 | 29.4 $\pm$ 2.9                  | 117.6   | 29.4 $\pm$ 3.0                  | 117.6 | 28.6 $\pm$ 1.0                  | 114.3 | 28.2 $\pm$ 2.9                  | 112.7   | 23.7 $\pm$ 1.4                  | 94.7  |
| Terbutryn     | -                               | < LOD                           | -     | < LOD                           | -       | < LOD                           | -     | < LOD                           | -     | < LOD                           | -       | < LOD                           | -     |
|               | 25.0                            | 26.3 $\pm$ 1.8                  | 105.1 | 29.1 $\pm$ 3.2                  | 116.3   | 27.5 $\pm$ 0.9                  | 110.2 | 23.5 $\pm$ 2.2                  | 93.9  | 23.8 $\pm$ 0.7                  | 95.1    | 23.9 $\pm$ 0.7                  | 95.7  |

| Analytes    | Added<br>(ng mL <sup>-1</sup> ) | Sample 1                        |      | Sample 2                        |         | Sample 3                        |      | Sample 4                        |       | Sample 5                        |         | Sample 6                        |      |
|-------------|---------------------------------|---------------------------------|------|---------------------------------|---------|---------------------------------|------|---------------------------------|-------|---------------------------------|---------|---------------------------------|------|
|             |                                 | Found<br>(ng mL <sup>-1</sup> ) | RR%  | Found<br>(ng mL <sup>-1</sup> ) | RR<br>% | Found<br>(ng mL <sup>-1</sup> ) | RR%  | Found<br>(ng mL <sup>-1</sup> ) | RR%   | Found<br>(ng mL <sup>-1</sup> ) | RR<br>% | Found<br>(ng mL <sup>-1</sup> ) | RR%  |
| Triflumuron | -                               | < LOD                           | -    | < LOD                           | -       | < LOD                           | -    | < LOD                           | -     | < LOD                           | -       | < LOD                           | -    |
|             | 25.0                            | 22.5 ± 3.5                      | 90.1 | 21.8 ± 1.0                      | 87.4    | 24.0 ± 0.3                      | 95.8 | 28.6 ± 1.4                      | 114.3 | 21.4 ± 1.5                      | 85.7    | 22.4 ± 2.0                      | 89.8 |
